# Supplementary material for: Prediction of Scar Size in Rats Six Months after Burns Based on Early Post-injury Polarization-Sensitive Optical Frequency Domain Imaging
Source: PubMed Central journal article supplement (PMC5717021; doi:10.3389/fphys.2017.00967), 2017-12-01
Supplement: DataSheet1.pdf [file DataSheet1.pdf]

## Supplementary information

**Table S1. Parameters of pulsed electric fields applied to burn wounds to modify scar formation as described in ref<sup>23</sup>. 3 repeats per each wound.**

| Voltage (V)    | Number of pulses (N) | Treatment frequency (days) | Scar_Area | Hom | DOPSlope |
|----------------|----------------------|----------------------------|-----------|-----|----------|
| Normal skin    |                      |                            | 100       | 100 | 100      |
| Untreated burn |                      |                            | 0         | 0   | 0        |
| 125            | 200                  | 10                         | 16        | 14  | 26       |
| 125            | 400                  | 20                         | 17        | 29  | 19       |
| 125            | 800                  | 30                         | 19        | 14  | 16       |
| 250            | 200                  | 20                         | 58        | 57  | 37       |
| 250            | 400                  | 30                         | 24        | 14  | 23       |
| 250            | 800                  | 10                         | 50        | 14  | 26       |
| 500            | 200                  | 30                         | 26        | 29  | 33       |
| 500            | 400                  | 10                         | 29        | -29 | 19       |
| 500            | 800                  | 20                         | 32        | -21 | 26       |

**Table S2. Coefficients of the linear model based on OFDI measurements at Month 1.** (n=36 wounds, 9 animals, OFDI data acquired from 2-3 volumes from each wound).

|          | Scar Area ( $\alpha_1$ ) | Hom ( $\gamma_1$ ) | DOPSlope ( $\delta_1$ ) | Intercept ( $\beta_0$ ) |
|----------|--------------------------|--------------------|-------------------------|-------------------------|
| count    | 36                       | 36                 | 36                      | 36                      |
| mean     | -2.783                   | 0.643              | -2.171                  | 40.314                  |
| std      | 0.288                    | 1.289              | 0.647                   | 1.392                   |
| min      | -3.657                   | -2.574             | -3.679                  | 34.281                  |
| 25%      | -2.899                   | 0.350              | -2.281                  | 40.078                  |
| 50%      | -2.795                   | 0.591              | -2.175                  | 40.319                  |
| 75%      | -2.635                   | 0.903              | -2.027                  | 40.606                  |
| max      | -2.144                   | 6.642              | 0.865                   | 43.869                  |
| std/mean | -0.104                   | 2.003              | -0.298                  | 0.035                   |

**Table S3. Coefficients of the linear model based on OFDI measurements at Month 2.** (n=36 wounds, 9 animals, OFDI data acquired from 2-3 volumes from each wound).

|       | Scar Area ( $\alpha_2$ ) | Hom ( $\gamma_2$ ) | DOPSlope ( $\delta_2$ ) | Intercept ( $\beta_0$ ) |
|-------|--------------------------|--------------------|-------------------------|-------------------------|
| count | 36                       | 36                 | 36                      | 36                      |
| mean  | 10.880                   | -8.524             | -5.258                  | 36.85                   |
| std   | 0.8654                   | 1.289              | 0.514                   | 0.779                   |
| min   | 9.779                    | -9.953             | -7.287                  | 34.256                  |
| 25%   | 10.472                   | -9.009             | -5.445                  | 36.674                  |
| 50%   | 10.853                   | -8.754             | -5.268                  | 36.904                  |

|          |        |        |        |        |
|----------|--------|--------|--------|--------|
| 75%      | 10.926 | -8.525 | -5.016 | 37.153 |
| max      | 15.213 | -2.273 | -3.908 | 38.395 |
| std/mean | 0.079  | -0.151 | -0.098 | 0.021  |

**Table S4. Coefficients of the linear model based on OFDI measurements at Month 3.** (n=36 wounds, 9 animals, OFDI data acquired from 2-3 volumes from each wound).

|          | <b>Scar Area<br/>(<math>\alpha_3</math>)</b> | <b>Hom<br/>(<math>\gamma_3</math>)</b> | <b>DOPSlope<br/>(<math>\delta_3</math>)</b> | <b>Intercept<br/>(<math>\beta_0</math>)</b> |
|----------|----------------------------------------------|----------------------------------------|---------------------------------------------|---------------------------------------------|
| count    | 36                                           | 36                                     | 36                                          | 36                                          |
| mean     | 12.197                                       | -0.502                                 | -4.994                                      | 40.165                                      |
| std      | 0.896                                        | 0.356                                  | 0.316                                       | 0.710                                       |
| min      | 10.045                                       | -1.952                                 | -5.637                                      | 38.282                                      |
| 25%      | 11.888                                       | -0.581                                 | -5.109                                      | 39.924                                      |
| 50%      | 12.313                                       | -0.497                                 | -4.997                                      | 40.178                                      |
| 75%      | 12.611                                       | -0.359                                 | -4.846                                      | 40.339                                      |
| max      | 14.230                                       | 0.739                                  | -4.098                                      | 42.272                                      |
| std/mean | 0.073                                        | -0.709                                 | -0.063                                      | 0.018                                       |

**Table S5. Coefficients of the linear model based on OFDI measurements at Months.**

**1&2.** (n=36 wounds, 9 animals, OFDI data acquired from 2-3 volumes from each wound).

|       | <b>ScarArea<br/>(<math>\alpha_1</math>)</b> | <b>Hom<br/>(<math>\gamma_1</math>)</b> | <b>DOPSlope<br/>(<math>\delta_1</math>)</b> | <b>Scar Area<br/>(<math>\alpha_2</math>)</b> | <b>Hom<br/>(<math>\gamma_2</math>)</b> | <b>DOPSlope<br/>(<math>\delta_2</math>)</b> | <b>Intercept<br/>(<math>\beta_0</math>)</b> |
|-------|---------------------------------------------|----------------------------------------|---------------------------------------------|----------------------------------------------|----------------------------------------|---------------------------------------------|---------------------------------------------|
| count | 36                                          | 36                                     | 36                                          | 36                                           | 36                                     | 36                                          | 36                                          |
| mean  | -1.930                                      | -2.971                                 | -3.2                                        | 11.028                                       | -9.014                                 | -5.149                                      | 43.556                                      |
| std   | 0.276                                       | 1.321                                  | 0.643                                       | 0.750                                        | 1.301                                  | 0.554                                       | 1.413                                       |
| min   | -2.684                                      | -6.755                                 | -5.509                                      | 9.743                                        | -10.694                                | -6.738                                      | 38.083                                      |
| 25%   | -2.030                                      | -3.096                                 | -3.292                                      | 10.558                                       | -9.659                                 | -5.403                                      | 43.370                                      |
| 50%   | -1.914                                      | -2.950                                 | -3.204                                      | 10.972                                       | -9.263                                 | -5.115                                      | 43.614                                      |
| 75%   | -1.774                                      | -2.607                                 | -3.090                                      | 11.286                                       | -8.736                                 | -4.914                                      | 43.887                                      |
| max   | -1.206                                      | 1.861                                  | -0.554                                      | 14.275                                       | -3.983                                 | -3.839                                      | 48.359                                      |

**Table S6. Coefficients of the linear model based on OFDI measurements at Months.**

**1&3.** (n=36 wounds, 9 animals, OFDI data acquired from 2-3 volumes from each wound).

|       | <b>Scar<br/>Area (<math>\alpha_1</math>)</b> | <b>Hom<br/>(<math>\gamma_1</math>)</b> | <b>DOPSlope<br/>(<math>\delta_1</math>)</b> | <b>Scar Area<br/>(<math>\alpha_3</math>)</b> | <b>Hom<br/>(<math>\gamma_3</math>)</b> | <b>DOPSlope<br/>(<math>\delta_3</math>)</b> | <b>Intercept<br/>(<math>\beta_0</math>)</b> |
|-------|----------------------------------------------|----------------------------------------|---------------------------------------------|----------------------------------------------|----------------------------------------|---------------------------------------------|---------------------------------------------|
| count | 36                                           | 36                                     | 36                                          | 36                                           | 36                                     | 36                                          | 36                                          |
| mean  | -1.969                                       | 2.562                                  | 0.953                                       | 11.521                                       | -1.183                                 | -4.415                                      | 40.168                                      |
| std   | 0.236                                        | 1.006                                  | 0.442                                       | 1.08                                         | 0.403                                  | 0.359                                       | 1.033                                       |
| min   | -2.585                                       | -1.185                                 | -0.585                                      | 7.896                                        | -2.733                                 | -5.433                                      | 37.682                                      |
| 25%   | -2.109                                       | 2.438                                  | 0.816                                       | 11.198                                       | -1.335                                 | -4.543                                      | 39.771                                      |
| 50%   | -1.952                                       | 2.676                                  | 0.967                                       | 11.642                                       | -1.213                                 | -4.361                                      | 40.120                                      |
| 75%   | -1.850                                       | 2.943                                  | 1.048                                       | 11.875                                       | -1.078                                 | -4.203                                      | 40.527                                      |
| max   | -1.551                                       | 5.187                                  | 2.438                                       | 13.937                                       | -0.126                                 | -3.767                                      | 43.695                                      |

|          |        |       |       |       |        |        |       |
|----------|--------|-------|-------|-------|--------|--------|-------|
| std/mean | -0.120 | 0.391 | 0.463 | 0.094 | -0.341 | -0.081 | 0.026 |
|----------|--------|-------|-------|-------|--------|--------|-------|

**Table S7. Coefficients of the linear model based on OFDI measurements at Months**

**2&3.** (n=36 wounds, 9 animals, OFDI data acquired from 2-3 volumes from each wound).

|          | Scar Area ( $\alpha_2$ ) | Hom ( $\gamma_2$ ) | DOPSlope ( $\delta_2$ ) | Scar Area ( $\alpha_3$ ) | Hom ( $\gamma_3$ ) | DOPSlope ( $\delta_3$ ) | Intercept ( $\beta_0$ ) |
|----------|--------------------------|--------------------|-------------------------|--------------------------|--------------------|-------------------------|-------------------------|
| count    | 36                       | 36                 | 36                      | 36                       | 36                 | 36                      | 36                      |
| mean     | 7.279                    | -14.027            | -4.564                  | 10.589                   | 0.574              | -6.210                  | 43.812                  |
| std      | 0.659                    | 1.267              | 0.435                   | 0.987                    | 0.442              | 0.525                   | 1.094                   |
| min      | 5.866                    | -16.993            | -5.474                  | 8.586                    | -1.380             | -7.824                  | 41.305                  |
| 25%      | 6.978                    | -14.326            | -4.816                  | 10.102                   | 0.487              | -6.436                  | 43.345                  |
| 50%      | 7.236                    | -14.079            | -4.603                  | 10.559                   | 0.591              | -6.249                  | 43.754                  |
| 75%      | 7.399                    | -13.688            | -4.274                  | 10.959                   | 0.684              | -6.035                  | 43.989                  |
| max      | 9.694                    | -10.555            | -3.576                  | 13.349                   | 1.524              | -4.938                  | 47.799                  |
| std/mean | 0.091                    | -0.090             | -0.095                  | 0.093                    | 0.770              | -0.085                  | 0.025                   |

**Table S8. Coefficients of the linear model based on OFDI measurements at Months 1&2&3.** (n=36 wounds, 9 animals, OFDI data acquired from 2-3 volumes from each wound).

|       | Scar Area ( $\alpha_1$ ) | Hom ( $\gamma_1$ ) | DOPSlope ( $\delta_1$ ) | Scar Area ( $\alpha_2$ ) | Hom ( $\gamma_2$ ) | DOPSlope ( $\delta_2$ ) | Scar Area ( $\alpha_3$ ) | Hom ( $\gamma_3$ ) | DOPSlope ( $\delta_3$ ) | Intercept ( $\beta_0$ ) |
|-------|--------------------------|--------------------|-------------------------|--------------------------|--------------------|-------------------------|--------------------------|--------------------|-------------------------|-------------------------|
| count | 36                       | 36                 | 36                      | 36                       | 36                 | 36                      | 36                       | 36                 | 36                      | 36                      |
| mean  | -0.045                   | -3.798             | -6.085                  | 0.352                    | -100.55            | -46.253                 | 0.4477                   | 2.530              | -58.548                 | 101.655                 |
| std   | 0.012                    | 8.045              | 4.896                   | 0.032                    | 11.141             | 5.462                   | 0.051                    | 3.639              | 6.462                   | 10.396                  |
| min   | -0.072                   | -                  | -24.155                 | 0.281                    | -127.903           | -56.609                 | 0.3353                   | -12.716            | -77.475                 | 70.225                  |
|       |                          | 23.849             |                         |                          |                    |                         |                          |                    |                         |                         |
| 25%   | -0.049                   | -4.823             | -7.940                  | 0.338                    | -103.975           | -50.212                 | 0.4255                   | 1.680              | -60.369                 | 97.430                  |
| 50%   | -0.044                   | -2.249             | -5.542                  | 0.350                    | -100.996           | -46.759                 | 0.4511                   | 2.516              | -58.400                 | 102.425                 |
| 75%   | -0.040                   | -0.480             | -4.313                  | 0.364                    | -97.171            | -43.109                 | 0.4671                   | 3.623              | -56.162                 | 105.164                 |
| max   | -0.012                   | 14.563             | 7.813                   | 0.459                    | -73.719            | -34.232                 | 0.5866                   | 10.683             | -43.930                 | 127.364                 |
